# Supplementary material for: Unpacking the Predictors of Loneliness: An Inferential Analysis from the INTERACT Study
Source: Research Square preprint supplement (doi:10.21203/rs.3.rs-6864203/v1), 2025-06-20
Supplement: Supplementary file 1 [file 8ddc13ad131d845416448c2b.docx]

**Supplementary file 2**

**Inferential Chi-Square**

**(UCLA & Direct measure of loneliness & Social capital score)**

**Association between low, moderate and high levels of loneliness (UCLA) and respondent characteristics**

The age distribution was significantly associated and varied considerably across loneliness levels (p<0.001) **Table 1**. Among those reporting no loneliness, 48.7% were over 65 years old, compared to 32.2% in the moderate loneliness group and only 17.4% in the severe loneliness group. Conversely, younger age groups (16-25 and 25-35) were more prevalent in the severe loneliness category (11.1% and 14.6%, respectively) compared to the no loneliness group (1.5% and 3.9%, respectively). Females constituted a larger proportion of those experiencing moderate (64.9%) and severe (62.8%) loneliness compared to those with no loneliness (55.8%) (p<0.001).

In terms of education, individuals with university degrees or higher were less represented in the severe loneliness group (40.2%) compared to the no loneliness (48.6%) and moderate loneliness (49.2%) groups (p<0.001) **Table 1**. Additionally, employment status showed notable differences, with retired individuals comprising 52.8% of the no loneliness group but only 20.8% of the severe loneliness group (p<0.001). Unemployed individuals were more prevalent in the severe loneliness category (14.2%) compared to the no loneliness group (1.3%). Marital status also varied significantly, with married or civil partnership individuals making up 70.1% of the no loneliness group but only 26.5% of the severe loneliness group (p<0.001). Single individuals were more represented in the severe loneliness category (37.5%) compared to the no loneliness group (8.4%).

The number of relatives and friends showed a clear association with loneliness levels (p<0.001) **Table 1**. Individuals with no relatives comprised 10.6% of the severe loneliness group compared to only 2.6% of the no loneliness group. Similarly, those with no friends made up 20.0% of the severe loneliness group but only 2.8% of the no loneliness group. Living alone was more common among those experiencing severe loneliness (36.8%) compared to those with no loneliness (16.4%). Furthermore, disability and long-term health conditions were more prevalent among those experiencing severe loneliness (p<0.001). Individuals with disabilities constituted 34.8% of the severe loneliness group compared to 9.3% of the no loneliness group. Similarly, those with long-term conditions made up 67.4% of the severe loneliness group but only 34.7% of the no loneliness group. Having children under 16 was more common in the severe loneliness group (33.0%) compared to the no loneliness group (14.5%).

**Table 1: Association between low, moderate and high levels of loneliness (UCLA) and respondent characteristics**

|  | **No loneliness** | | **Moderate loneliness** | | **Severe loneliness** | | **Total** | | **p-value** |
| --- | --- | --- | --- | --- | --- | --- | --- | --- | --- |
| Category | (N) | (%) | (N) | (%) | (N) | (%) | (N) | (%) |  |
| **Age** |  |  |  |  |  |  |  |  | <0.001 |
| 16-25 | 583 | 1.5 | 3,183 | 5.7 | 4,586 | 11.1 | 8,352 | 6.2 |  |
| 25-35 | 1,502 | 3.9 | 5,534 | 10.0 | 6,021 | 14.6 | 13,057 | 9.6 |  |
| 36-45 | 2,392 | 6.2 | 6,178 | 11.1 | 6,436 | 15.6 | 15,006 | 11.1 |  |
| 46-55 | 4,852 | 12.5 | 9,062 | 16.3 | 8,117 | 19.6 | 22,031 | 16.2 |  |
| 56-65 | 10,525 | 27.2 | 13,720 | 24.7 | 8,990 | 21.8 | 33,235 | 24.5 |  |
| >65 | 18,845 | 48.7 | 17,899 | 32.2 | 7,183 | 17.4 | 43,927 | 32.4 |  |
| **Gender** |  |  |  |  |  |  |  |  | <0.001 |
| Female | 21,588 | 55.8 | 36,102 | 64.9 | 25,971 | 62.8 | 83,661 | 61.7 |  |
| Male | 16,983 | 43.9 | 19,092 | 34.3 | 14,654 | 35.4 | 50,729 | 37.4 |  |
| Other | 69 | 0.2 | 246 | 0.4 | 489 | 1.2 | 804 | 0.6 |  |
| Would rather not say | 82 | 0.2 | 173 | 0.3 | 243 | 0.6 | 498 | 0.4 |  |
| **Education** |  |  |  |  |  |  |  |  | <0.001 |
| A levels/College | 9,896 | 27.3 | 14,645 | 28.5 | 12,159 | 32.4 | 36,700 | 29.3 |  |
| Secondary School | 8,758 | 24.1 | 11,419 | 22.2 | 10,304 | 27.4 | 30,481 | 24.3 |  |
| University Degree or higher | 17,632 | 48.6 | 25,288 | 49.2 | 15,088 | 40.2 | 58,008 | 46.3 |  |
| **Employment** |  |  |  |  |  |  |  |  | <0.001 |
| Employed full-time | 8,777 | 24.4 | 17,152 | 33.7 | 12,459 | 33.4 | 38,388 | 30.9 |  |
| Employed part-time | 3,928 | 10.9 | 6,663 | 13.1 | 4,013 | 10.8 | 14,604 | 11.8 |  |
| Other | 413 | 1.1 | 1,128 | 2.2 | 2,596 | 6.9 | 4,137 | 3.3 |  |
| Retired | 18,961 | 52.8 | 18,303 | 36.0 | 7,774 | 20.8 | 45,038 | 36.3 |  |
| Self-employed | 2,443 | 6.8 | 3,140 | 6.2 | 2,025 | 5.4 | 7,608 | 6.1 |  |
| Student (full or part-time) | 305 | 0.8 | 1,533 | 3.0 | 1,895 | 5.1 | 3,733 | 3.0 |  |
| Unemployed | 461 | 1.3 | 1,855 | 3.6 | 5,313 | 14.2 | 7,629 | 6.1 |  |
| Unpaid carer | 150 | 0.4 | 537 | 1.1 | 873 | 2.3 | 1,560 | 1.3 |  |
| Volunteer (full or part-time) | 507 | 1.4 | 601 | 1.2 | 351 | 0.9 | 1,459 | 1.2 |  |
| **Ethnicity** |  |  |  |  |  |  |  |  | <0.001 |
| Asian/Asian British | 907 | 2.5 | 2,161 | 4.2 | 2,094 | 5.6 | 5,162 | 4.1 |  |
| British Black/African/Caribbean | 434 | 1.2 | 941 | 1.8 | 935 | 2.5 | 2,310 | 1.9 |  |
| Mixed/Multiple ethnic groups | 387 | 1.1 | 770 | 1.5 | 868 | 2.3 | 2,025 | 1.6 |  |
| Other ethnic group | 603 | 1.7 | 1,030 | 2.0 | 1,089 | 2.9 | 2,722 | 2.2 |  |
| White | 33,752 | 93.4 | 46,104 | 90.1 | 32,308 | 86.1 | 112,164 | 89.8 |  |
| White and Black Caribbean | 72 | 0.2 | 166 | 0.3 | 224 | 0.6 | 462 | 0.4 |  |
| **Marital status** |  |  |  |  |  |  |  |  | <0.001 |
| Divorced | 2,280 | 6.3 | 5,256 | 10.2 | 5,225 | 13.9 | 12,761 | 10.2 |  |
| In a relationship | 3,017 | 8.3 | 5,497 | 10.7 | 3,890 | 10.3 | 12,404 | 9.9 |  |
| Married / Civil partnership | 25,470 | 70.1 | 25,150 | 48.9 | 9,992 | 26.5 | 60,612 | 48.3 |  |
| Other | 466 | 1.3 | 1,146 | 2.2 | 1,380 | 3.7 | 2,992 | 2.4 |  |
| Widowed | 2,022 | 5.6 | 4,546 | 8.8 | 3,057 | 8.1 | 9,625 | 7.7 |  |
| Single | 3,059 | 8.4 | 9,793 | 19.1 | 14,131 | 37.5 | 26,983 | 21.5 |  |
| **Number of relatives** |  |  |  |  |  |  |  |  | <0.001 |
| 0 [11] relatives | 959 | 2.6 | 2,255 | 4.4 | 3,981 | 10.6 | 7,195 | 5.7 |  |
| 1 relative | 1,586 | 4.4 | 4,120 | 8.0 | 6,395 | 17.0 | 12,101 | 9.6 |  |
| 2 relatives | 2,949 | 8.1 | 8,500 | 16.5 | 9,545 | 25.3 | 20,994 | 16.7 |  |
| 3 or 4 relatives | 9,703 | 26.7 | 17,947 | 34.9 | 11,994 | 31.8 | 39,644 | 31.6 |  |
| 5-8 relatives | 12,201 | 33.6 | 12,961 | 25.2 | 4,494 | 11.9 | 29,656 | 23.6 |  |
| 9 or more relatives | 8,923 | 24.6 | 5,619 | 10.9 | 1,283 | 3.4 | 15,825 | 12.6 |  |
| **Number of friends** |  |  |  |  |  |  |  |  | <0.001 |
| 0 [11] friends | 1,022 | 2.8 | 3,363 | 6.5 | 7,551 | 20.0 | 11,936 | 9.5 |  |
| 1 friend | 1,193 | 3.3 | 4,735 | 9.2 | 7,922 | 21.0 | 13,850 | 11.0 |  |
| 2 friends | 2,613 | 7.2 | 8,078 | 15.7 | 8,497 | 22.5 | 19,188 | 15.3 |  |
| 3 or 4 friends | 7,917 | 21.8 | 15,035 | 29.3 | 8,727 | 23.2 | 31,679 | 25.3 |  |
| 5-8 friends | 10,207 | 28.1 | 11,663 | 22.7 | 3,429 | 9.1 | 25,299 | 20.2 |  |
| 9 or more friends | 13,370 | 36.8 | 8,524 | 16.6 | 1,571 | 4.2 | 23,465 | 18.7 |  |
| **Having pet** |  |  |  |  |  |  |  |  | <0.001 |
| No | 21,728 | 59.9 | 28,491 | 55.5 | 19,676 | 52.3 | 69,895 | 55.8 |  |
| Yes | 14,566 | 40.1 | 22,875 | 44.5 | 17,972 | 47.7 | 55,413 | 44.2 |  |
| **Number of household members** |  |  |  |  |  |  |  |  | <0.001 |
| 0 members | 5,948 | 16.4 | 13,673 | 26.6 | 13,868 | 36.8 | 33,489 | 26.7 |  |
| 1 member | 20,257 | 55.8 | 21,236 | 41.3 | 11,267 | 29.9 | 52,760 | 42.1 |  |
| 2-3 members | 8,075 | 22.2 | 12,936 | 25.2 | 9,396 | 24.9 | 30,407 | 24.2 |  |
| 4-5 members | 1,773 | 4.9 | 3,008 | 5.9 | 2,497 | 6.6 | 7,278 | 5.8 |  |
| > 5 members | 280 | 0.8 | 546 | 1.1 | 668 | 1.8 | 1,494 | 1.2 |  |
| **Having children** |  |  |  |  |  |  |  |  | <0.001 |
| No | 7,563 | 20.8 | 16,783 | 32.7 | 16,338 | 43.4 | 40,684 | 32.5 |  |
| Yes | 28,717 | 79.2 | 34,557 | 67.3 | 21,287 | 56.6 | 84,561 | 67.5 |  |
| **Having children under 16** |  |  |  |  |  |  |  |  | <0.001 |
| No | 24,467 | 85.5 | 26,305 | 76.4 | 14,219 | 67.0 | 64,991 | 77.1 |  |
| Yes | 4,160 | 14.5 | 8,121 | 23.6 | 7,006 | 33.0 | 19,287 | 22.9 |  |
| **Having disability** |  |  |  |  |  |  |  |  | <0.001 |
| No | 32,497 | 89.5 | 41,613 | 81.0 | 22,707 | 60.3 | 96,817 | 77.3 |  |
| Prefer not to say | 436 | 1.2 | 1,295 | 2.5 | 1,853 | 4.9 | 3,584 | 2.9 |  |
| Yes | 3,364 | 9.3 | 8,450 | 16.5 | 13,101 | 34.8 | 24,915 | 19.9 |  |
| **Having long-term condition** |  |  |  |  |  |  |  |  | <0.001 |
| No | 23,149 | 63.8 | 26,162 | 50.9 | 10,949 | 29.1 | 60,260 | 48.1 |  |
| Prefer not to say | 558 | 1.5 | 1,204 | 2.3 | 1,323 | 3.5 | 3,085 | 2.5 |  |
| Yes | 12,604 | 34.7 | 24,023 | 46.7 | 25,411 | 67.4 | 62,038 | 49.5 |  |
| *Values are presented as frequencies (percentages) within each group*  ********: Statistical comparisons were performed using Pearson’s Chi-squared test with p-values indicating significance* | | | | | | | | | |

**Association between low, moderate and high levels of loneliness (DMOL) and respondent characteristics**

The age distribution varied considerably across loneliness levels (p<0.001) **Table 2**. Among those reporting no loneliness, 45.1% were over 65 years old, compared to 28.6% in the moderate loneliness group and only 17.3% in the severe loneliness group. Conversely, younger age groups (16-25 and 25-35) were more prevalent in the severe loneliness category (11.3% and 14.9%, respectively) compared to the no loneliness group (2.2% and 4.9%, respectively). Females constituted a larger proportion of those experiencing moderate (66.2%) and severe (61.5%) loneliness compared to those with no loneliness (55.1%) (p<0.001).

In terms of education, individuals with university degrees or higher were less represented in the severe loneliness group (37.0%) compared to the no loneliness (50.5%) and moderate loneliness (46.4%) groups (p<0.001) **Table 2**. Employment status showed notable differences (p<0.001), with retired individuals comprising 49.3% of the no loneliness group but only 20.7% of the severe loneliness group. Unemployed individuals were more prevalent in the severe loneliness category (17.1%) compared to the no loneliness group (1.6%). Marital status also varied significantly (p<0.001), with married or civil partnership individuals making up 67.8% of the no loneliness group but only 24.7% of the severe loneliness group. Single individuals were more represented in the severe loneliness category (40.4%) compared to the no loneliness group (10.0%).

The number of relatives and friends showed a clear association with loneliness levels (p<0.001) **Table 2**. Individuals with no relatives comprised 12.3% of the severe loneliness group compared to only 3.1% of the no loneliness group. Similarly, those with no friends made up 22.0% of the severe loneliness group but only 3.8% of the no loneliness group. Living alone was more common among those experiencing severe loneliness (38.6%) compared to those with no loneliness (17.1%) (p<0.001). Additionally, Disability and long-term health conditions were more prevalent among those experiencing severe loneliness (p<0.001). Individuals with disabilities constituted 36.1% of the severe loneliness group compared to 10.7% of the no loneliness group. Similarly, those with long-term conditions made up 69.1% of the severe loneliness group but only 37.0% of the no loneliness group. Having children under 16 was more common in the severe loneliness group (32.9%) compared to the no loneliness group (16.3%) (p<0.001).

**Table 2: Association between low, moderate and high levels of loneliness (DMOL) and respondent characteristics**

|  | **No loneliness** | | **Moderate loneliness** | | **Severe loneliness** | | **Total** | | **p-value** |
| --- | --- | --- | --- | --- | --- | --- | --- | --- | --- |
| Category | (N) | (%) | (N) | (%) | (N) | (%) | (N) | (%) |  |
| **Age** |  |  |  |  |  |  |  |  | <0.001 |
| 16-25 | 1,015 | 2.2 | 4,821 | 7.2 | 2,516 | 11.3 | 8,352 | 6.2 |  |
| 25-35 | 2,289 | 4.9 | 7,447 | 11.1 | 3,321 | 14.9 | 13,057 | 9.6 |  |
| 36-45 | 3,387 | 7.3 | 8,023 | 12.0 | 3,596 | 16.1 | 15,006 | 11.1 |  |
| 46-55 | 6,210 | 13.4 | 11,390 | 17.0 | 4,431 | 19.8 | 22,031 | 16.2 |  |
| 56-65 | 12,532 | 27.1 | 16,098 | 24.0 | 4,605 | 20.6 | 33,235 | 24.5 |  |
| >65 | 20,886 | 45.1 | 19,172 | 28.6 | 3,869 | 17.3 | 43,927 | 32.4 |  |
| **Gender** |  |  |  |  |  |  |  |  | <0.001 |
| Female | 25,536 | 55.1 | 44,378 | 66.2 | 13,747 | 61.5 | 83,661 | 61.7 |  |
| Male | 20,565 | 44.4 | 21,978 | 32.8 | 8,186 | 36.6 | 50,729 | 37.4 |  |
| Other | 137 | 0.3 | 384 | 0.6 | 283 | 1.3 | 804 | 0.6 |  |
| Would rather not say | 111 | 0.2 | 246 | 0.4 | 141 | 0.6 | 498 | 0.4 |  |
| **Education** |  |  |  |  |  |  |  |  | <0.001 |
| A levels/College | 11,871 | 27.2 | 18,316 | 29.8 | 6,513 | 32.5 | 36,700 | 29.3 |  |
| Secondary School | 9,746 | 22.3 | 14,629 | 23.8 | 6,106 | 30.5 | 30,481 | 24.3 |  |
| University Degree or higher | 22,033 | 50.5 | 28,548 | 46.4 | 7,427 | 37.0 | 58,008 | 46.3 |  |
| **Employment** |  |  |  |  |  |  |  |  | <0.001 |
| Employed full-time | 11,558 | 26.7 | 20,618 | 33.8 | 6,212 | 31.2 | 38,388 | 30.9 |  |
| Employed part-time | 4,796 | 11.1 | 7,774 | 12.7 | 2,034 | 10.2 | 14,604 | 11.8 |  |
| Other | 594 | 1.4 | 1,978 | 3.2 | 1,565 | 7.8 | 4,137 | 3.3 |  |
| Retired | 21,339 | 49.3 | 19,582 | 32.1 | 4,117 | 20.7 | 45,038 | 36.3 |  |
| Self-employed | 2,928 | 6.8 | 3,670 | 6.0 | 1,010 | 5.1 | 7,608 | 6.1 |  |
| Student (full or part-time) | 536 | 1.2 | 2,250 | 3.7 | 947 | 4.8 | 3,733 | 3.0 |  |
| Unemployed | 687 | 1.6 | 3,546 | 5.8 | 3,396 | 17.1 | 7,629 | 6.1 |  |
| Unpaid carer | 223 | 0.5 | 900 | 1.5 | 437 | 2.2 | 1,560 | 1.3 |  |
| Volunteer (full or part-time) | 610 | 1.4 | 667 | 1.1 | 182 | 0.9 | 1,459 | 1.2 |  |
| **Ethnicity** |  |  |  |  |  |  |  |  | <0.001 |
| Asian/Asian British | 1,148 | 2.6 | 2,764 | 4.5 | 1,250 | 6.2 | 5,162 | 4.1 |  |
| British Black/African/Caribbean | 511 | 1.2 | 1,263 | 2.1 | 536 | 2.7 | 2,310 | 1.9 |  |
| Mixed/Multiple ethnic groups | 488 | 1.1 | 1,078 | 1.8 | 459 | 2.3 | 2,025 | 1.6 |  |
| Other ethnic group | 721 | 1.7 | 1,311 | 2.1 | 690 | 3.4 | 2,722 | 2.2 |  |
| White | 40,525 | 93.2 | 54,653 | 89.2 | 16,986 | 84.7 | 112,164 | 89.8 |  |
| White and Black Caribbean | 99 | 0.2 | 226 | 0.4 | 137 | 0.7 | 462 | 0.4 |  |
| **Marital status** |  |  |  |  |  |  |  |  | <0.001 |
| Divorced | 2,915 | 6.7 | 7,030 | 11.4 | 2,816 | 14.0 | 12,761 | 10.2 |  |
| In a relationship | 4,017 | 9.2 | 6,682 | 10.9 | 1,705 | 8.5 | 12,404 | 9.9 |  |
| Married / Civil partnership | 29,623 | 67.8 | 26,007 | 42.2 | 4,982 | 24.7 | 60,612 | 48.3 |  |
| Other | 594 | 1.4 | 1,592 | 2.6 | 806 | 4.0 | 2,992 | 2.4 |  |
| Widowed | 2,168 | 5.0 | 5,764 | 9.4 | 1,693 | 8.4 | 9,625 | 7.7 |  |
| Single | 4,362 | 10.0 | 14,488 | 23.5 | 8,133 | 40.4 | 26,983 | 21.5 |  |
| **Number of relatives** |  |  |  |  |  |  |  |  | <0.001 |
| 0 [11] relatives | 1,362 | 3.1 | 3,359 | 5.5 | 2,474 | 12.3 | 7,195 | 5.7 |  |
| 1 relative | 2,188 | 5.0 | 6,316 | 10.3 | 3,597 | 17.8 | 12,101 | 9.6 |  |
| 2 relatives | 4,074 | 9.3 | 11,958 | 19.4 | 4,962 | 24.6 | 20,994 | 16.7 |  |
| 3 or 4 relatives | 11,944 | 27.3 | 21,794 | 35.4 | 5,906 | 29.3 | 39,644 | 31.6 |  |
| 5-8 relatives | 14,219 | 32.5 | 13,091 | 21.3 | 2,346 | 11.6 | 29,656 | 23.6 |  |
| 9 or more relatives | 9,897 | 22.7 | 5,057 | 8.2 | 871 | 4.3 | 15,825 | 12.6 |  |
| **Number of friends** |  |  |  |  |  |  |  |  | <0.001 |
| 0 [11] friends | 1,667 | 3.8 | 5,826 | 9.5 | 4,443 | 22.0 | 11,936 | 9.5 |  |
| 1 friend | 1,872 | 4.3 | 7,712 | 12.5 | 4,266 | 21.2 | 13,850 | 11.0 |  |
| 2 friends | 3,717 | 8.5 | 11,295 | 18.3 | 4,176 | 20.7 | 19,188 | 15.3 |  |
| 3 or 4 friends | 9,964 | 22.8 | 17,533 | 28.5 | 4,182 | 20.7 | 31,679 | 25.3 |  |
| 5-8 friends | 11,779 | 27.0 | 11,624 | 18.9 | 1,896 | 9.4 | 25,299 | 20.2 |  |
| 9 or more friends | 14,684 | 33.6 | 7,584 | 12.3 | 1,197 | 5.9 | 23,465 | 18.7 |  |
| **Having pet** |  |  |  |  |  |  |  |  | <0.001 |
| No | 25,580 | 58.6 | 33,424 | 54.3 | 10,891 | 54.1 | 69,895 | 55.8 |  |
| Yes | 18,079 | 41.4 | 28,109 | 45.7 | 9,225 | 45.9 | 55,413 | 44.2 |  |
| **Number of household members** |  |  |  |  |  |  |  |  | <0.001 |
| 0 members | 7,450 | 17.1 | 18,267 | 29.7 | 7,772 | 38.6 | 33,489 | 26.7 |  |
| 1 member | 23,703 | 54.2 | 23,311 | 37.9 | 5,746 | 28.5 | 52,760 | 42.1 |  |
| 2-3 members | 10,040 | 23.0 | 15,519 | 25.2 | 4,848 | 24.1 | 30,407 | 24.2 |  |
| 4-5 members | 2,166 | 5.0 | 3,731 | 6.1 | 1,381 | 6.9 | 7,278 | 5.8 |  |
| > 5 members | 336 | 0.8 | 752 | 1.2 | 406 | 2.0 | 1,494 | 1.2 |  |
| **Having children** |  |  |  |  |  |  |  |  | <0.001 |
| No | 10,469 | 24.0 | 21,669 | 35.2 | 8,546 | 42.5 | 40,684 | 32.5 |  |
| Yes | 33,174 | 76.0 | 39,823 | 64.8 | 11,564 | 57.5 | 84,561 | 67.5 |  |
| **Having children under 16** |  |  |  |  |  |  |  |  | <0.001 |
| No | 27,686 | 83.7 | 29,572 | 74.5 | 7,733 | 67.1 | 64,991 | 77.1 |  |
| Yes | 5,372 | 16.3 | 10,119 | 25.5 | 3,796 | 32.9 | 19,287 | 22.9 |  |
| **Having disability** |  |  |  |  |  |  |  |  | <0.001 |
| No | 38,373 | 87.9 | 46,581 | 75.7 | 11,863 | 58.9 | 96,817 | 77.3 |  |
| Prefer not to say | 593 | 1.4 | 1,982 | 3.2 | 1,009 | 5.0 | 3,584 | 2.9 |  |
| Yes | 4,692 | 10.7 | 12,952 | 21.1 | 7,271 | 36.1 | 24,915 | 19.9 |  |
| **Having long-term condition** |  |  |  |  |  |  |  |  | <0.001 |
| No | 26,835 | 61.4 | 27,894 | 45.3 | 5,531 | 27.5 | 60,260 | 48.1 |  |
| Prefer not to say | 685 | 1.6 | 1,703 | 2.8 | 697 | 3.5 | 3,085 | 2.5 |  |
| Yes | 16,162 | 37.0 | 31,956 | 51.9 | 13,920 | 69.1 | 62,038 | 49.5 |  |
| *Values are presented as frequencies (percentages) within each group*  ********: Statistical comparisons were performed using Pearson’s Chi-squared test with p-values indicating significance* | | | | | | | | | |

**Association between low and high social capital scale and respondent characteristics**

The age distribution varied considerably across score levels (p<0.001) **Table 3**. Among those with high scores, 40.8% were over 65 years old, compared to only 21.9% in the low-score group. Conversely, younger age groups (16-25 and 25-35) were more prevalent in the low score category (9.1% and 14.0%, respectively) compared to the high score group (3.2% and 5.8%, respectively) (p<0.001). Gender distribution was relatively similar between low and high-score groups, with females, constituting 61.8% of the low-score group and 61.3% of the high-score group (p<0.001). In terms of education, individuals with university degrees or higher were more represented in the high score group (49.3%) compared to the low score group (44.0%) (p<0.001).

Employment status showed notable differences, with retired individuals comprising 45.5% of the high-score group but only 24.7% of the low-score group (p<0.001) **Table 3**. Unemployed individuals were more prevalent in the low score category (9.7%) compared to the high score group (2.9%) (p<0.001). Marital status also varied significantly, with married or civil partnership individuals making up 58.1% of the high-score group but only 37.7% of the low-score group (p<0.001). Single individuals were more represented in the low score category (30.1%) compared to the high score group (14.0%) (p<0.001).

The number of relatives and friends showed a clear association with score levels (p<0.001) **Table 3**. Individuals with no relatives comprised 8.2% of the low-score group compared to only 3.3% of the high-score group (p<0.001). Similarly, those with no friends made up 14.9% of the low-score group but only 4.5% of the high-score group (p<0.001). Living alone was more common among those with high scores (47.1%) compared to those with low scores (36.6%) (p<0.001). Additionally, disability and long-term health conditions were more prevalent among those with low scores (p<0.001). Individuals with disabilities constituted 25.2% of the low-score group compared to 14.7% of the high-score group (p<0.001). Similarly, those with long-term conditions made up 56.5% of the low-score group but only 43.2% of the high-score group (p<0.001). Having children was more common in the high-score group (73.6%) compared to the low-score group (60.1%) (p<0.001). However, having children under 16 was more prevalent in the low score group (28.7%) compared to the high score group (19.3%) (p<0.001).

**Table 3: Association between low and high social capital scale and respondent characteristics**

|  | **Low score** | | **High score** | | **Total** | | **p-value** |
| --- | --- | --- | --- | --- | --- | --- | --- |
| Category | (N) | (%) | (N) | (%) | (N) | (%) |  |
| **Age** |  |  |  |  |  |  | <0.001 |
| 16-25 | 5192 | (9.1%) | 2020 | (3.2%) | 7212 | (6.0%) |  |
| 25-35 | 7943 | (14.0%) | 3673 | (5.8%) | 11616 | (9.6%) |  |
| 36-45 | 7897 | (13.9%) | 5501 | (8.6%) | 13398 | (11.1%) |  |
| 46-55 | 10322 | (18.2%) | 9569 | (15.0%) | 19891 | (16.5%) |  |
| 56-65 | 13062 | (23.0%) | 16900 | (26.6%) | 29962 | (24.9%) |  |
| >65 | 12435 | (21.9%) | 25986 | (40.8%) | 38421 | (31.9%) |  |
| **Gender** |  |  |  |  |  |  | <0.001 |
| Female | 35138 | (61.8%) | 39063 | (61.3%) | 74201 | (61.5%) |  |
| Male | 20988 | (36.9%) | 24301 | (38.2%) | 45289 | (37.6%) |  |
| Other | 532 | (0.9%) | 185 | (0.3%) | 717 | (0.6%) |  |
| Would rather not say | 221 | (0.4%) | 138 | (0.2%) | 359 | (0.3%) |  |
| **Education** |  |  |  |  |  |  | <0.001 |
| A levels/College | 17240 | (30.4%) | 18162 | (28.6%) | 35402 | (29.4%) |  |
| Secondary School | 14548 | (25.7%) | 14085 | (22.2%) | 28633 | (23.8%) |  |
| University Degree or higher | 24928 | (44.0%) | 31335 | (49.3%) | 56263 | (46.8%) |  |
| **Employment** |  |  |  |  |  |  | <0.001 |
| Employed full-time | 20713 | (36.7%) | 16805 | (26.6%) | 37518 | (31.4%) |  |
| Employed part-time | 6534 | (11.6%) | 7622 | (12.1%) | 14156 | (11.8%) |  |
| Other | 2591 | (4.6%) | 1362 | (2.1%) | 3953 | (3.3%) |  |
| Retired | 13928 | (24.7%) | 28691 | (45.5%) | 42619 | (35.7%) |  |
| Self-employed | 3071 | (5.4%) | 4277 | (6.8%) | 7348 | (6.2%) |  |
| Student (full or part-time) | 2579 | (4.6%) | 1104 | (1.7%) | 3683 | (3.1%) |  |
| Unemployed | 5452 | (9.7%) | 1843 | (2.9%) | 7295 | (6.1%) |  |
| Unpaid carer | 971 | (1.7%) | 528 | (0.8%) | 1499 | (1.3%) |  |
| Volunteer (full or part-time) | 547 | (1.0%) | 857 | (1.4%) | 1404 | (1.2%) |  |
| **Ethnicity** |  |  |  |  |  |  | <0.001 |
| Asian/Asian British | 2994 | (5.3%) | 1935 | (3.1%) | 4929 | (4.1%) |  |
| British Black/African/Caribbean | 1545 | (2.7%) | 598 | (0.9%) | 2143 | (1.8%) |  |
| Mixed/Multiple ethnic groups | 1207 | (2.1%) | 737 | (1.2%) | 1944 | (1.6%) |  |
| Other ethnic group | 1595 | (2.8%) | 978 | (1.5%) | 2573 | (2.1%) |  |
| White | 48968 | (86.5%) | 59004 | (93.1%) | 107972 | (90.0%) |  |
| White and Black Caribbean | 291 | (0.5%) | 154 | (0.2%) | 445 | (0.4%) |  |
| **Marital status** |  |  |  |  |  |  | <0.001 |
| Divorced | 6509 | (11.5%) | 5621 | (8.8%) | 12130 | (10.1%) |  |
| In a relationship | 6733 | (11.8%) | 5398 | (8.5%) | 12131 | (10.1%) |  |
| Married / Civil partnership | 21430 | (37.7%) | 36991 | (58.1%) | 58421 | (48.5%) |  |
| Other | 1719 | (3.0%) | 1133 | (1.8%) | 2852 | (2.4%) |  |
| Widowed | 3343 | (5.9%) | 5591 | (8.8%) | 8934 | (7.4%) |  |
| Single | 17099 | (30.1%) | 8927 | (14.0%) | 26026 | (21.6%) |  |
| **Number of relatives** |  |  |  |  |  |  | <0.001 |
| 0 [11] relatives | 4659 | (8.2%) | 2123 | (3.3%) | 6782 | (5.6%) |  |
| 1 relative | 7354 | (12.9%) | 4188 | (6.6%) | 11542 | (9.6%) |  |
| 2 relatives | 11802 | (20.8%) | 8346 | (13.1%) | 20148 | (16.7%) |  |
| 3 or 4 relatives | 18555 | (32.6%) | 19629 | (30.8%) | 38184 | (31.7%) |  |
| 5-8 relatives | 10189 | (17.9%) | 18422 | (28.9%) | 28611 | (23.7%) |  |
| 9 or more relatives | 4292 | (7.5%) | 10964 | (17.2%) | 15256 | (12.7%) |  |
| **Number of friends** |  |  |  |  |  |  | <0.001 |
| 0 [11] friends | 8482 | (14.9%) | 2887 | (4.5%) | 11369 | (9.4%) |  |
| 1 friend | 9084 | (16.0%) | 4177 | (6.6%) | 13261 | (11.0%) |  |
| 2 friends | 10969 | (19.3%) | 7442 | (11.7%) | 18411 | (15.3%) |  |
| 3 or 4 friends | 14212 | (25.0%) | 16258 | (25.5%) | 30470 | (25.3%) |  |
| 5-8 friends | 8293 | (14.6%) | 16057 | (25.2%) | 24350 | (20.2%) |  |
| 9 or more friends | 5815 | (10.2%) | 16844 | (26.5%) | 22659 | (18.8%) |  |
| **Having pet** |  |  |  |  |  |  | 0.0221 |
| No | 31668 | (55.8%) | 35052 | (55.1%) | 66720 | (55.4%) |  |
| Yes | 25112 | (44.2%) | 28544 | (44.9%) | 53656 | (44.6%) |  |
| **Number of household members** |  |  |  |  |  |  | <0.001 |
| 0 members | 16569 | (29.2%) | 15087 | (23.7%) | 31656 | (26.3%) |  |
| 1 member | 20775 | (36.6%) | 30009 | (47.1%) | 50784 | (42.2%) |  |
| 2-3 members | 14721 | (25.9%) | 14816 | (23.3%) | 29537 | (24.5%) |  |
| 4-5 members | 3850 | (6.8%) | 3236 | (5.1%) | 7086 | (5.9%) |  |
| > 5 members | 918 | (1.6%) | 502 | (0.8%) | 1420 | (1.2%) |  |
| **Having children** |  |  |  |  |  |  | <0.001 |
| No | 22627 | (39.9%) | 16791 | (26.4%) | 39418 | (32.8%) |  |
| Yes | 34124 | (60.1%) | 46766 | (73.6%) | 80890 | (67.2%) |  |
| **Having children under 16** |  |  |  |  |  |  | <0.001 |
| No | 24237 | (71.3%) | 37639 | (80.7%) | 61876 | (76.7%) |  |
| Yes | 9774 | (28.7%) | 8976 | (19.3%) | 18750 | (23.3%) |  |
| **Having disability** |  |  |  |  |  |  | <0.001 |
| No | 40280 | (70.9%) | 53113 | (83.5%) | 93393 | (77.6%) |  |
| Prefer not to say | 2202 | (3.9%) | 1131 | (1.8%) | 3333 | (2.8%) |  |
| Yes | 14296 | (25.2%) | 9350 | (14.7%) | 23646 | (19.6%) |  |
| **Having long-term condition** |  |  |  |  |  |  | <0.001 |
| No | 23010 | (40.5%) | 34978 | (55.0%) | 57988 | (48.1%) |  |
| Prefer not to say | 1714 | (3.0%) | 1164 | (1.8%) | 2878 | (2.4%) |  |
| Yes | 32096 | (56.5%) | 27479 | (43.2%) | 59575 | (49.5%) |  |
| *Values are presented as frequencies (percentages) within each group*  ********: Statistical comparisons were performed using Pearson’s Chi-squared test with p-values indicating significance* | | | | | | | |
