# Supplementary material for: Unpacking the Predictors of Loneliness: An Inferential Analysis from the INTERACT Study
Source: Research Square preprint supplement (doi:10.21203/rs.3.rs-6864203/v1), 2025-06-20
Supplement: Supplementary file 2 [file b2b9e4e401c105d93cf08b8b.docx]

**Supplementary Table 2**

**Supplementary file 2: Prevalence of low, moderate and high levels of loneliness (DMOL) across respondent characteristics**

| **Category** | **Subcategory** | **No loneliness**  **(N=46355)** | | **Moderate loneliness**  **(N=67001)** | | **Severe loneliness**  **(N=22366)** | | **Total**  **(N=135722)** | |
| --- | --- | --- | --- | --- | --- | --- | --- | --- | --- |
|  |  | N | % | N | % | N | % | N | % |
| **Age** | 16-25 | 1015 | 2.2% | 4821 | 7.2% | 2516 | 11.2% | 8352 | 6.2% |
| 25-35 | 2289 | 4.9% | 7447 | 11.1% | 3321 | 14.8% | 13057 | 9.6% |
| 36-45 | 3387 | 7.3% | 8023 | 12.0% | 3596 | 16.1% | 15006 | 11.1% |
| 46-55 | 6210 | 13.4% | 11390 | 17.0% | 4431 | 19.8% | 22031 | 16.2% |
| 56-65 | 12532 | 27.0% | 16098 | 24.0% | 4605 | 20.6% | 33235 | 24.5% |
| >65 | 20886 | 45.1% | 19172 | 28.6% | 3869 | 17.3% | 43927 | 32.4% |
| N-Miss | 36 | 0.1% | 50 | 0.1% | 28 | 0.1% | 114 | 0.1% |
| **Gender** | Female | 25536 | 55.1% | 44378 | 66.2% | 13747 | 61.5% | 83661 | 61.6% |
| Male | 20565 | 44.4% | 21978 | 32.8% | 8186 | 36.6% | 50729 | 37.4% |
| Other | 137 | 0.3% | 384 | 0.6% | 283 | 1.3% | 804 | 0.6% |
| Would rather not say | 111 | 0.2% | 246 | 0.4% | 141 | 0.6% | 498 | 0.4% |
| N-Miss | 6 | 0.0% | 15 | 0.0% | 9 | 0.0% | 30 | 0.0% |
| **Education** | A levels/College | 11871 | 25.6% | 18316 | 27.3% | 6513 | 29.1% | 36700 | 27.0% |
| Secondary School | 9746 | 21.0% | 14629 | 21.8% | 6106 | 27.3% | 30481 | 22.5% |
| University Degree or higher | 22033 | 47.5% | 28548 | 42.6% | 7427 | 33.2% | 58008 | 42.7% |
| N-Miss | 2705 | 5.8% | 5508 | 8.2% | 2320 | 10.4% | 10533 | 7.8% |
| **Employment** | Employed full-time | 11558 | 24.9% | 20618 | 30.8% | 6212 | 27.8% | 38388 | 28.3% |
| Employed part-time | 4796 | 10.3% | 7774 | 11.6% | 2034 | 9.1% | 14604 | 10.8% |
| Furloughed | 8 | 0.0% | 25 | 0.0% | 21 | 0.1% | 54 | 0.0% |
| Other | 586 | 1.3% | 1953 | 2.9% | 1544 | 6.9% | 4083 | 3.0% |
| Retired | 21339 | 46.0% | 19582 | 29.2% | 4117 | 18.4% | 45038 | 33.2% |
| Self-employed | 2928 | 6.3% | 3670 | 5.5% | 1010 | 4.5% | 7608 | 5.6% |
| Student (full or part-time) | 536 | 1.2% | 2250 | 3.4% | 947 | 4.2% | 3733 | 2.8% |
| Unemployed | 687 | 1.5% | 3546 | 5.3% | 3396 | 15.2% | 7629 | 5.6% |
| Unpaid carer | 223 | 0.5% | 900 | 1.3% | 437 | 2.0% | 1560 | 1.1% |
| Volunteer (full or part-time) | 610 | 1.3% | 667 | 1.0% | 182 | 0.8% | 1459 | 1.1% |
| N-Miss | 3084 | 6.7% | 6016 | 9.0% | 2466 | 11.0% | 11566 | 8.5% |
| **Ethnicity** | Asian/Asian British | 1148 | 2.5% | 2764 | 4.1% | 1250 | 5.6% | 5162 | 3.8% |
| British Black/African/Caribbean | 511 | 1.1% | 1263 | 1.9% | 536 | 2.4% | 2310 | 1.7% |
| Mixed/Multiple ethnic groups | 488 | 1.1% | 1078 | 1.6% | 459 | 2.1% | 2025 | 1.5% |
| Other ethnic group | 721 | 1.6% | 1311 | 2.0% | 690 | 3.1% | 2722 | 2.0% |
| White | 40525 | 87.4% | 54653 | 81.6% | 16986 | 75.9% | 112164 | 82.6% |
| White and Black Caribbean | 99 | 0.2% | 226 | 0.3% | 137 | 0.6% | 462 | 0.3% |
| N-Miss | 2863 | 6.2% | 5706 | 8.5% | 2308 | 10.3% | 10877 | 8.0% |
| **Marital Status** | Divorced | 2915 | 6.3% | 7030 | 10.5% | 2816 | 12.6% | 12761 | 9.4% |
| In a relationship | 4017 | 8.7% | 6682 | 10.0% | 1705 | 7.6% | 12404 | 9.1% |
| Married / Civil partnership | 29623 | 63.9% | 26007 | 38.8% | 4982 | 22.3% | 60612 | 44.7% |
| Other | 594 | 1.3% | 1592 | 2.4% | 806 | 3.6% | 2992 | 2.2% |
| Widowed | 2168 | 4.7% | 5764 | 8.6% | 1693 | 7.6% | 9625 | 7.1% |
| single | 4362 | 9.4% | 14488 | 21.6% | 8133 | 36.4% | 26983 | 19.9% |
| N-Miss | 2676 | 5.8% | 5438 | 8.1% | 2231 | 10.0% | 10345 | 7.6% |
| **Having relatives** | 0 [11] | 1362 | 2.9% | 3359 | 5.0% | 2474 | 11.1% | 7195 | 5.3% |
| 1 | 2188 | 4.7% | 6316 | 9.4% | 3597 | 16.1% | 12101 | 8.9% |
| 2 | 4074 | 8.8% | 11958 | 17.8% | 4962 | 22.2% | 20994 | 15.5% |
| 3 or 4 | 11944 | 25.8% | 21794 | 32.5% | 5906 | 26.4% | 39644 | 29.2% |
| 5-8 | 14219 | 30.7% | 13091 | 19.5% | 2346 | 10.5% | 29656 | 21.9% |
| 9 or more | 9897 | 21.4% | 5057 | 7.5% | 871 | 3.9% | 15825 | 11.7% |
| N-Miss | 2671 | 5.8% | 5426 | 8.1% | 2210 | 9.9% | 10307 | 7.6% |
| **Having friends** | 0 [11] | 1667 | 3.6% | 5826 | 8.7% | 4443 | 19.9% | 11936 | 8.8% |
| 1 | 1872 | 4.0% | 7712 | 11.5% | 4266 | 19.1% | 13850 | 10.2% |
| 2 | 3717 | 8.0% | 11295 | 16.9% | 4176 | 18.7% | 19188 | 14.1% |
| 3 or 4 | 9964 | 21.5% | 17533 | 26.2% | 4182 | 18.7% | 31679 | 23.3% |
| 5-8 | 11779 | 25.4% | 11624 | 17.3% | 1896 | 8.5% | 25299 | 18.6% |
| 9 or more | 14684 | 31.7% | 7584 | 11.3% | 1197 | 5.4% | 23465 | 17.3% |
| N-Miss | 2672 | 5.8% | 5427 | 8.1% | 2206 | 9.9% | 10305 | 7.6% |
| **Having pets** | No | 25580 | 55.2% | 33424 | 49.9% | 10891 | 48.7% | 69895 | 51.5% |
| Yes | 18079 | 39.0% | 28109 | 42.0% | 9225 | 41.2% | 55413 | 40.8% |
| N-Miss | 2696 | 5.8% | 5468 | 8.2% | 2250 | 10.1% | 10414 | 7.7% |
| **Household size** | 0 members | 7450 | 16.1% | 18267 | 27.3% | 7772 | 34.7% | 33489 | 24.7% |
| 1 member | 23703 | 51.1% | 23311 | 34.8% | 5746 | 25.7% | 52760 | 38.9% |
| 2-3 members | 10040 | 21.7% | 15519 | 23.2% | 4848 | 21.7% | 30407 | 22.4% |
| 4-5 members | 2166 | 4.7% | 3731 | 5.6% | 1381 | 6.2% | 7278 | 5.4% |
| > 5 members | 336 | 0.7% | 752 | 1.1% | 406 | 1.8% | 1494 | 1.1% |
| N-Miss | 2660 | 5.7% | 5421 | 8.1% | 2213 | 9.9% | 10294 | 7.6% |
| **Having children** | No | 10469 | 22.6% | 21669 | 32.3% | 8546 | 38.2% | 40684 | 30.0% |
| Yes | 33174 | 71.6% | 39823 | 59.4% | 11564 | 51.7% | 84561 | 62.3% |
| N-Miss | 2712 | 5.9% | 5509 | 8.2% | 2256 | 10.1% | 10477 | 7.7% |
| **Having children under 16** | No | 27686 | 83.5% | 29572 | 74.3% | 7733 | 66.9% | 64991 | 76.9% |
| Yes | 5372 | 16.2% | 10119 | 25.4% | 3796 | 32.8% | 19287 | 22.8% |
| N-Miss | 116 | 0.3% | 132 | 0.3% | 35 | 0.3% | 283 | 0.3% |
| **Having disability** | No | 38373 | 82.8% | 46581 | 69.5% | 11863 | 53.0% | 96817 | 71.3% |
| Prefer not to say | 593 | 1.3% | 1982 | 3.0% | 1009 | 4.5% | 3584 | 2.6% |
| Yes | 4692 | 10.1% | 12952 | 19.3% | 7271 | 32.5% | 24915 | 18.4% |
| N-Miss | 2697 | 5.8% | 5486 | 8.2% | 2223 | 9.9% | 10406 | 7.7% |
| **Having long-term conditions** | No | 26835 | 57.9% | 27894 | 41.6% | 5531 | 24.7% | 60260 | 44.4% |
| Prefer not to say | 685 | 1.5% | 1703 | 2.5% | 697 | 3.1% | 3085 | 2.3% |
| Yes | 16162 | 34.9% | 31956 | 47.7% | 13920 | 62.2% | 62038 | 45.7% |
| N-Miss | 2673 | 5.8% | 5448 | 8.1% | 2218 | 9.9% | 10339 | 7.6% |
